# Supplementary material for: Surface-enhanced Raman scattering-active desert-rose-like Ag mesoparticles prepared using cyclic voltammetric methods
Source: Royal Society of Chemistry journal article supplement (doi:10.1039/c5ra18085f), 2015-01-01
Supplement: c5ra18085f1.pdf [file c5ra18085f1.pdf]

Supporting information

**Surface-Enhanced Raman Scattering-Active Desert-Rose-Like Ag Mesoparticles**

**Prepared Using Cyclic Voltammetric Methods**

*You-Hong You, Yang-Wei Lin\*, and Chung-Yu Chen*

Department of Chemistry, National Changhua University of Education, Changhua,

Taiwan

Address correspondence to these authors at Department of Chemistry, National

Changhua University of Education, Changhua City, PO Box 500, Taiwan; Fax:; E-mail:

[linywjerry@cc.ncue.edu.tw](mailto:linywjerry@cc.ncue.edu.tw)

Table S1. SERS EFs of the different substrates

| Name       | Constituents                                        | $I_{bulk}^a$ | $N_{bulk}$           | $I_{SERS}$ | $N_{SERS}$        | $B^b$ | $EF^c$            | Remarks                                    |
|------------|-----------------------------------------------------|--------------|----------------------|------------|-------------------|-------|-------------------|--------------------------------------------|
| 4-MBA/SPCE | 4-MBA powder spread on SPCE                         | 1246         | $2.0 \times 10^{12}$ | -          | -                 | -     | -                 | Inherent Raman of 4-MBA                    |
| Ag/SPCE    | Irregularly shaped Ag particles deposited on SPCE   | -            | -                    | 874        | $7.2 \times 10^7$ | 0.8   | $2.5 \times 10^4$ | See text for synthesis and characteristics |
| DR_Ag/SPCE | Desert-rose-like Ag mesoparticles deposited on SPCE | -            | -                    | 29960      | $7.5 \times 10^8$ | 0.5   | $1.3 \times 10^5$ | See text for synthesis and characteristics |

<sup>a</sup>Raman intensity is the intensity of the Raman peak at  $1582 \text{ cm}^{-1}$

<sup>b</sup>B (hindrance) is defined in eq. (2) in the text

<sup>c</sup>EF is defined in eq. (1) in the text

Table S2. Reproducibility test for desert-rose-like Ag mesoparticles deposited on the SPCE

| Raman intensity<br>Substrate | Intra-day                                        |                                     | Inter-day                           |                                     |
|------------------------------|--------------------------------------------------|-------------------------------------|-------------------------------------|-------------------------------------|
|                              | 1075 cm <sup>-1</sup> ( $\pm$ RSD%) <sup>a</sup> | 1582 cm <sup>-1</sup> ( $\pm$ RSD%) | 1075 cm <sup>-1</sup> ( $\pm$ RSD%) | 1582 cm <sup>-1</sup> ( $\pm$ RSD%) |
| 1                            | 720.1 ( $\pm$ 4.1%)                              | 1227.0 ( $\pm$ 1.9%)                | 719.7 ( $\pm$ 5.1%)                 | 1229.7 ( $\pm$ 6.7%)                |
| 2                            | 718.3 ( $\pm$ 3.2%)                              | 1223.2 ( $\pm$ 1.9%)                | 711.1 ( $\pm$ 2.2%)                 | 1225.5 ( $\pm$ 1.9%)                |
| 3                            | 711.1 ( $\pm$ 2.2%)                              | 1225.5 ( $\pm$ 1.9%)                | 709.5 ( $\pm$ 2.1%)                 | 1230.3 ( $\pm$ 4.3%)                |

<sup>a</sup>RSD (relative standard derivation) is calculated by dividing the standard deviation by the mean value of the data set ( $n = 3$ ).

Table S3. The preparation processes, EFs, durability, and applications of various desert-rose-like metal structures deposited on SERS substrates

| Substrate                                       | Preparation process                                                    | EFs                                                                                      | Durability     | Applications | Ref.       |
|-------------------------------------------------|------------------------------------------------------------------------|------------------------------------------------------------------------------------------|----------------|--------------|------------|
| Au nanoflakes on quartz                         | Supramolecular templates and sputtering process (two-step method)      | $2.4 \times 10^4$ for 4-ATP                                                              | a              | a            | 1          |
| Flower-like Au nanostructure array on Si        | Photolithography and electrodeposition (two-step method)               | a                                                                                        | a              | Adenine/DNA  | 2          |
| Ag nanodesert rose on Si                        | Galvanic displacement process (one-step method)                        | $3.0 \times 10^4$ for NPE<br>$2.0 \times 10^5$ for 4-MPy<br>$2.0 \times 10^{10}$ for R6G | a              | a            | 3          |
| Au nanoflake on Si                              | Peptide mesocrystal templates and sputtering process (two-step method) | $2.0 \times 10^4$ for 4-MBA                                                              | a              | a            | 4          |
| Flower-like Ag microstructures on a glass plane | Chemical reduction on PANI/PVA composite film (two-step method)        | $1.9 \times 10^5$ for 4-MBA                                                              | a              | a            | 5          |
| Ag mesoparticles on a SPCE                      | One step electrochemical reduction                                     | $1.3 \times 10^5$ for 4-MBA                                                              | 150 °C/30 days | FAH gene     | This study |

<sup>a</sup>not provided

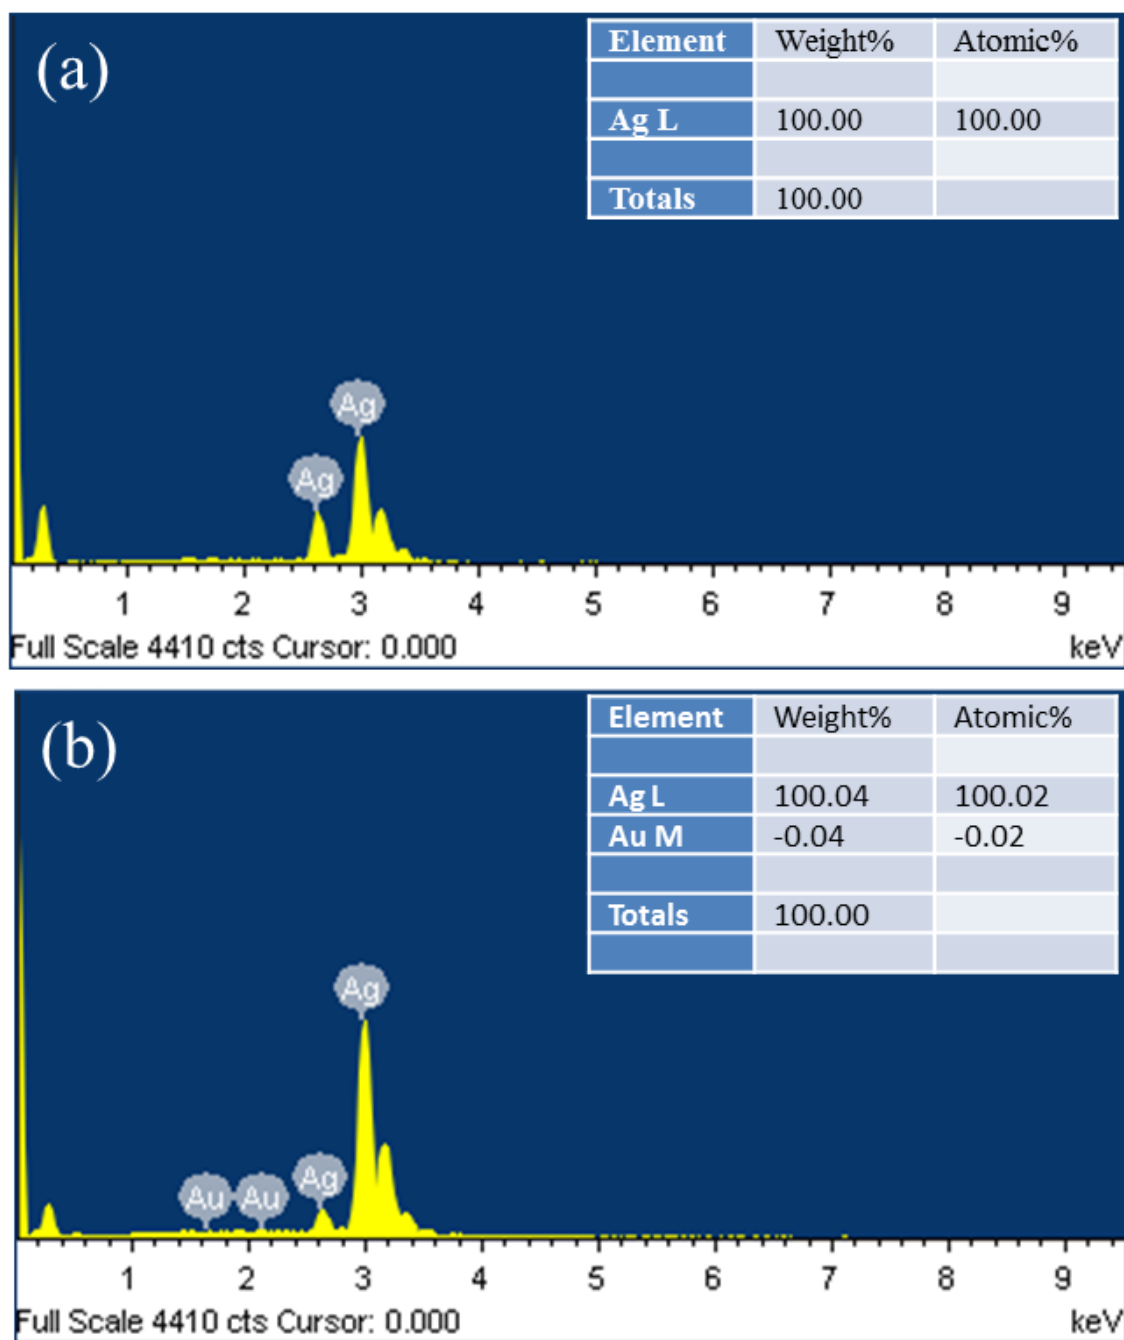

Figure S1. energy-dispersive X-ray spectroscopy (EDS) spectra of the (a) irregularly shaped Ag particles and (b) desert-rose-like Ag mesoparticles on SPCE.

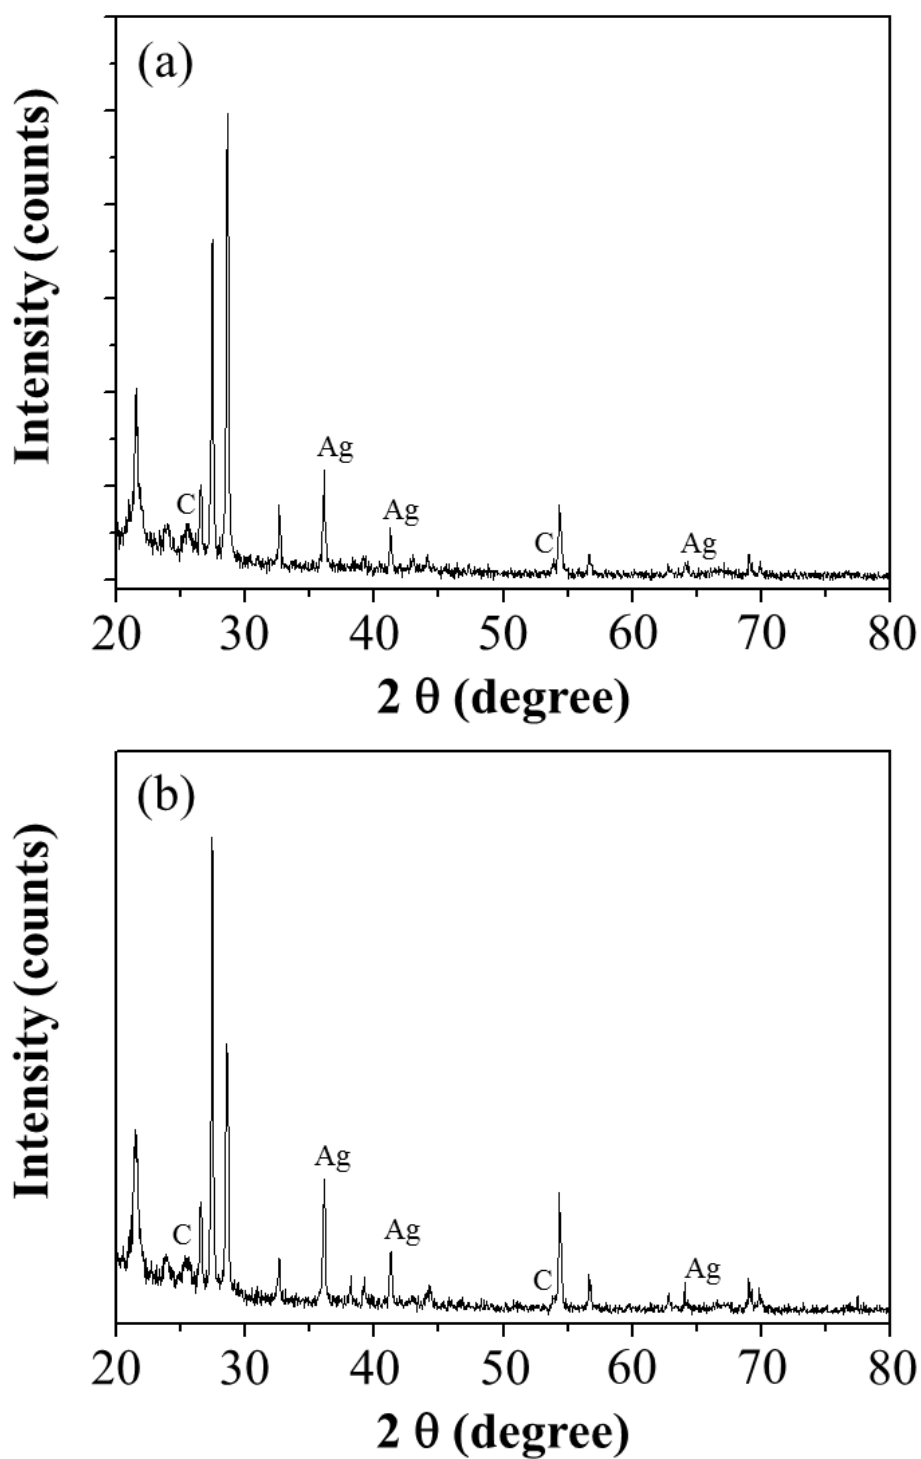

Figure S2. High resolution X-ray powder diffraction (HRXRD) spectra of the (a) irregularly shaped Ag particles and (b) desert-rose-like Ag mesoparticles on SPCE.

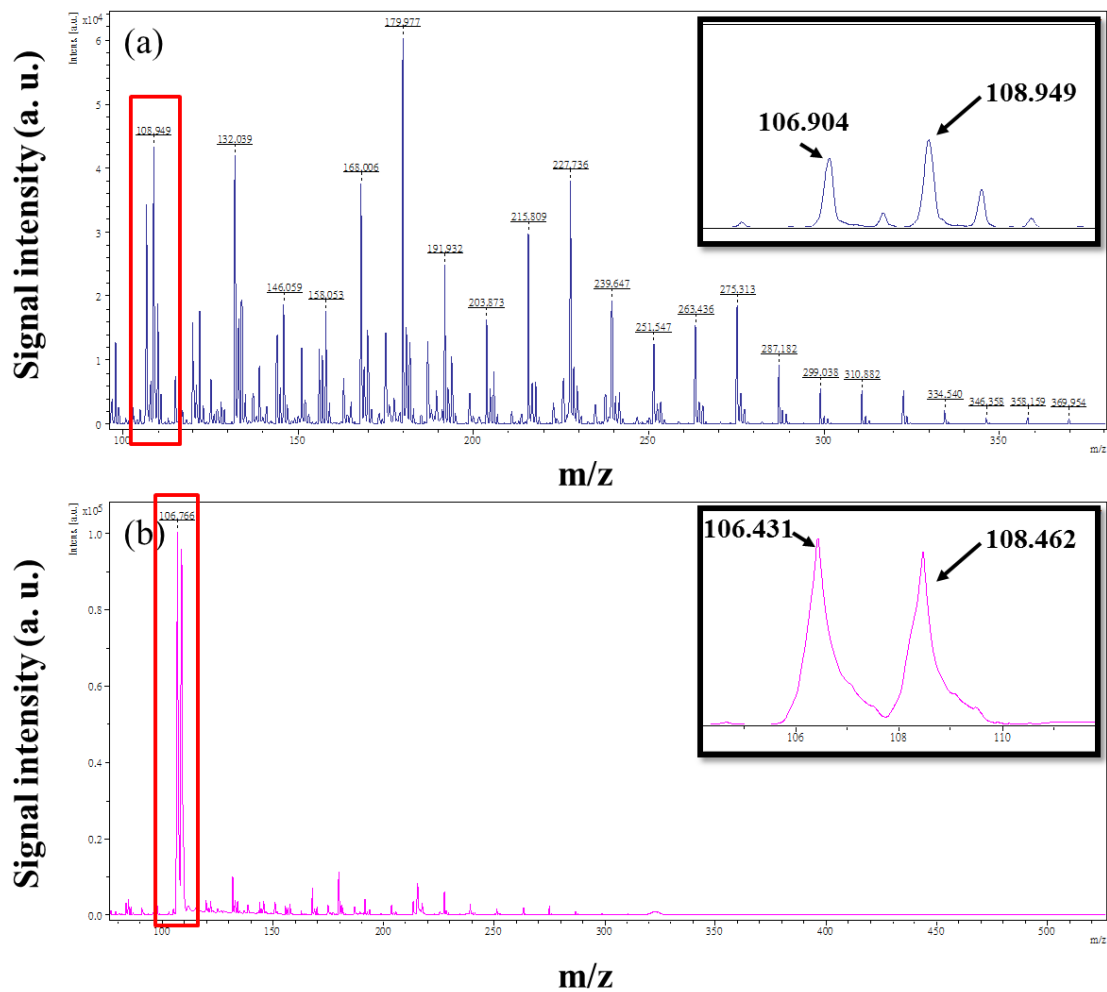

Figure S3. Surface-assisted laser desorption/ionization mass spectrometry (SALDI-MS) spectra of the (a) irregularly shaped Ag particles and (b) desert-rose-like Ag mesoparticles on SPCE.

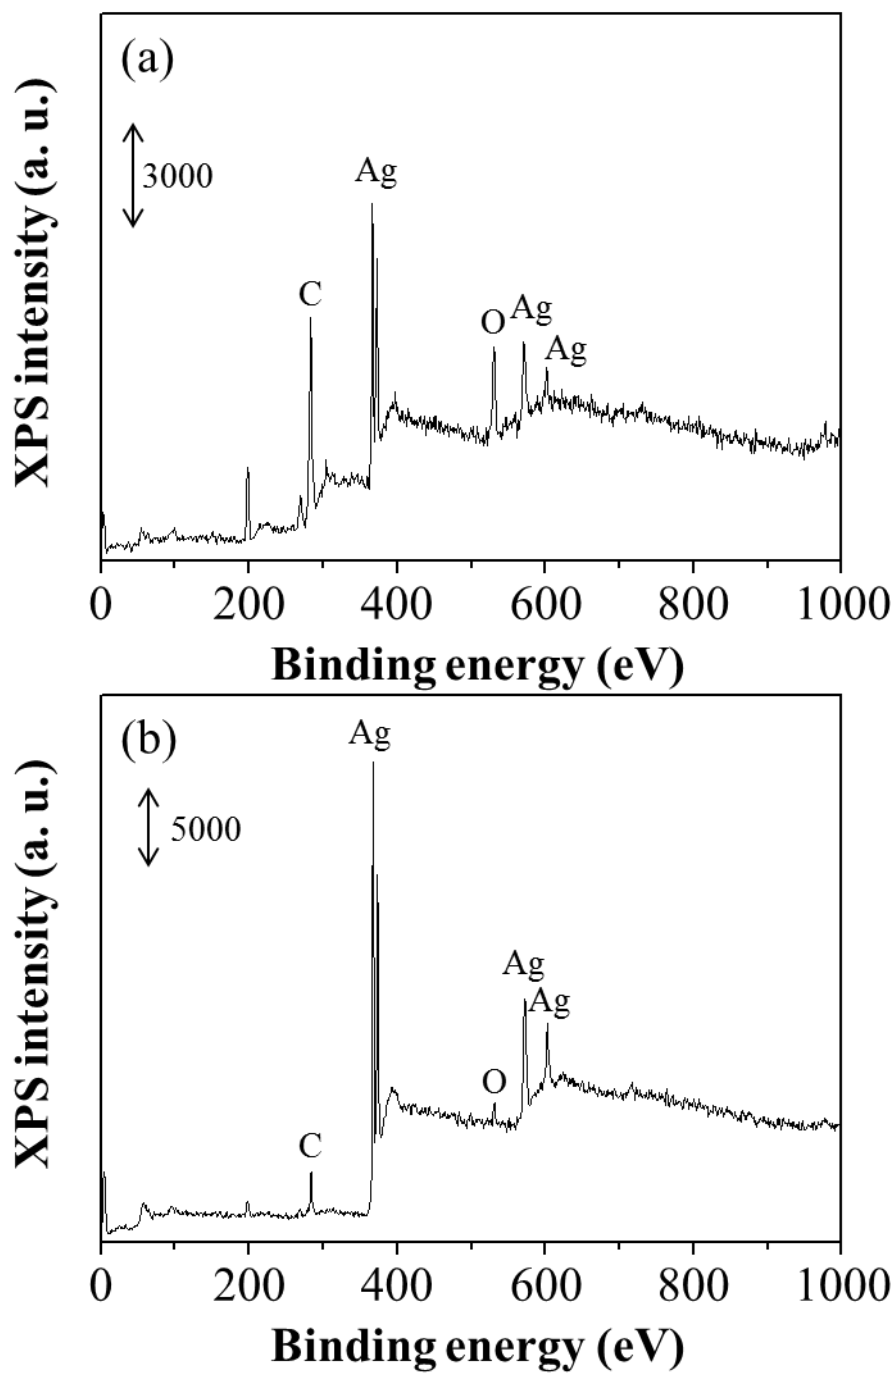

Figure S4. X-ray photoelectron spectroscopy (XPS) spectra of the (a) irregularly shaped Ag particles and (b) desert-rose-like Ag mesoparticles on SPCE.



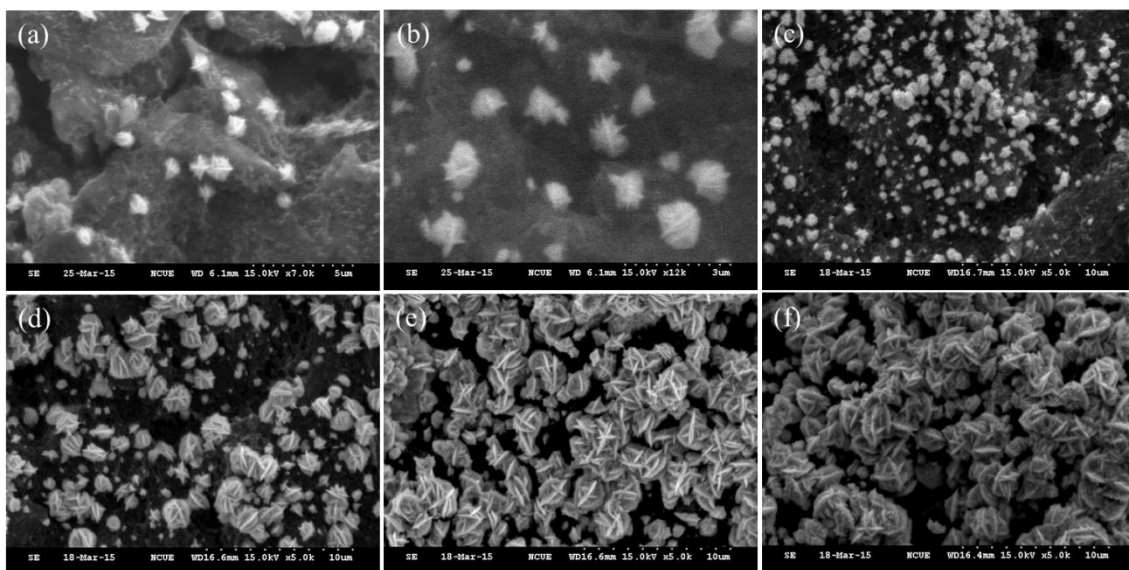

Figure S5. Representative SEM images of the desert-rose-like Ag mesoparticles at various electrodeposition times: (a) 1 min; scale bar = 5 μm, (b) 3 min; scale bar = 3 μm, (c) 5 min, (d) 15 min, (e) 30 min, and (f) 45 min. Scale bar = 10 μm in (c)–(f).

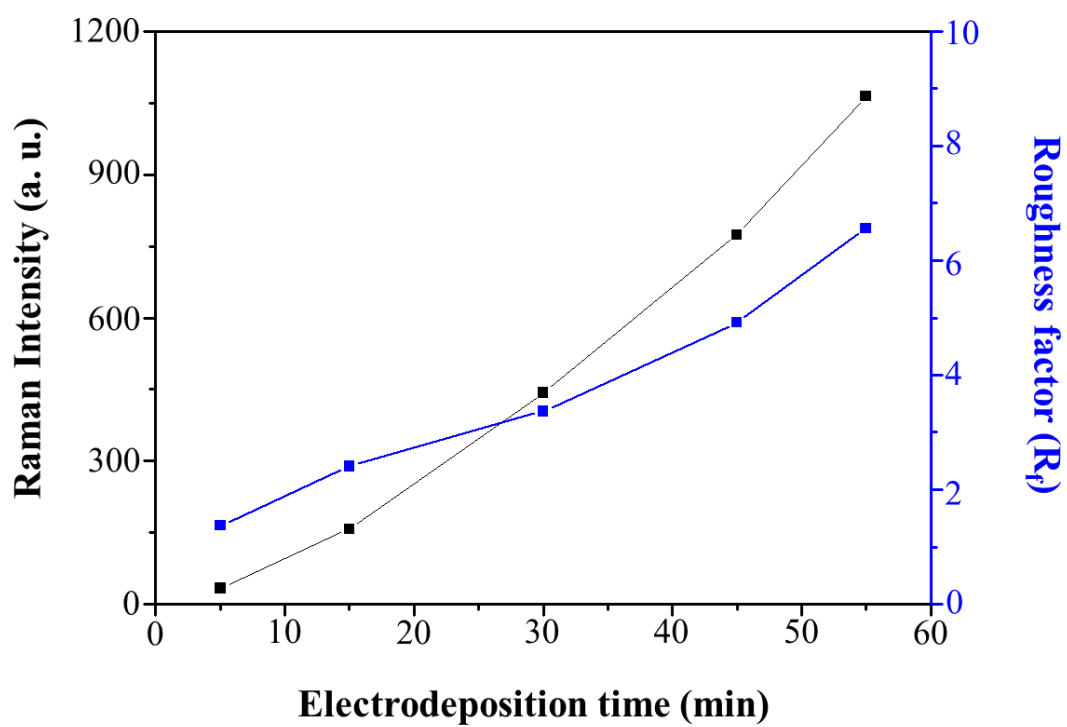

Figure S6. The relationship among the electrodeposition time, roughness factor, and Raman intensity of the desert-rose-like Ag mesoparticles.

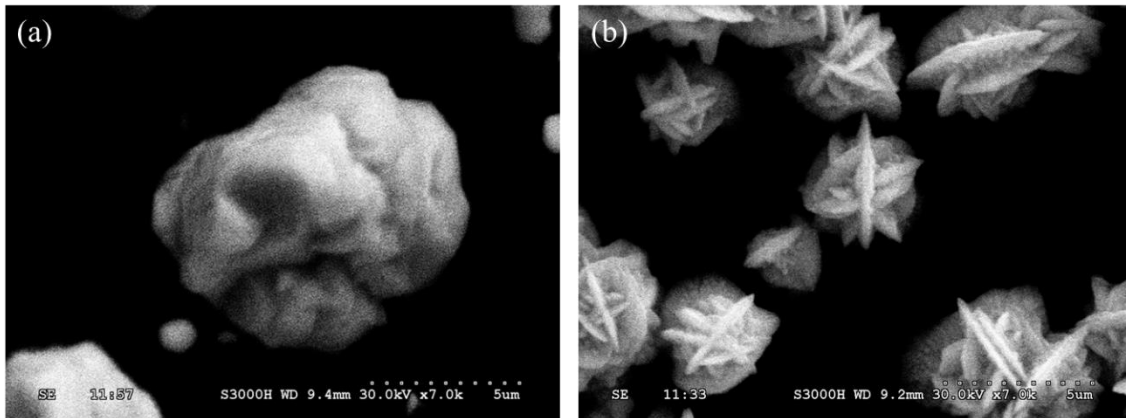

Figure S7. SEM images of Ag structures prepared in 10 mM AgNO<sub>3</sub> aqueous solution containing the (a) precipitates and (b) supernatants of 0.36 nM Au NP (diameter: 13.3 ± 1.7 nm) suspensions.

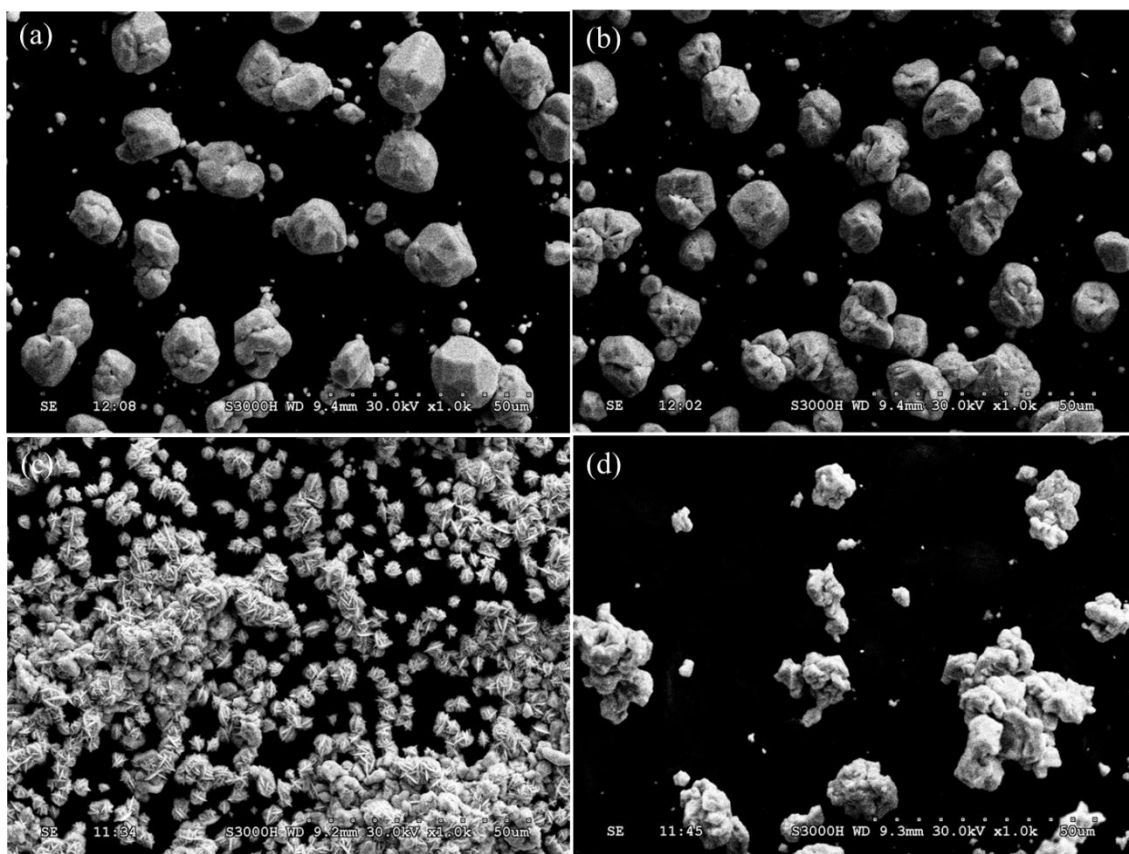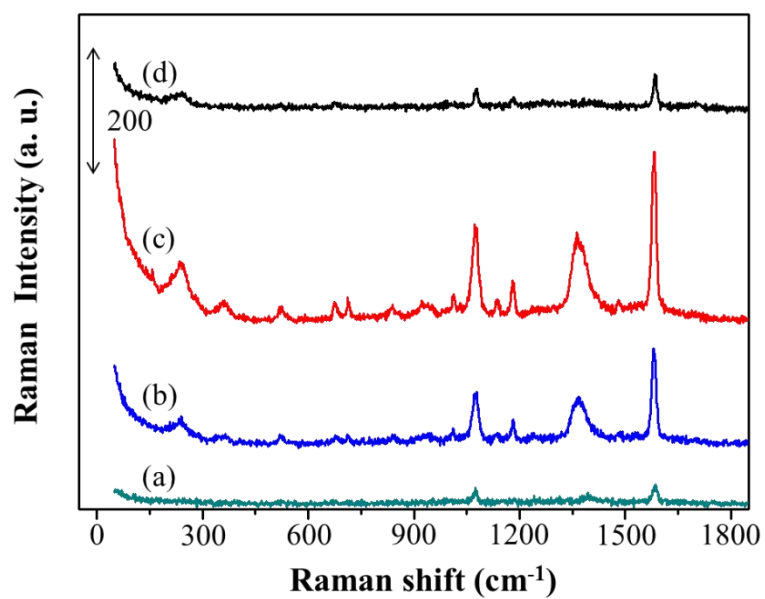

Figure S8. SEM images and SERS spectra of 4-MBA ( $10^{-5}$  M) molecules adsorbed onto Ag substrates fabricated by 10 mM  $\text{Ag}^+$  deposition solution containing various concentrations of sodium citrate: (a)  $10^{-7}$ , (b)  $10^{-6}$ , (c)  $10^{-5}$ , and (d)  $10^{-4}$  M.

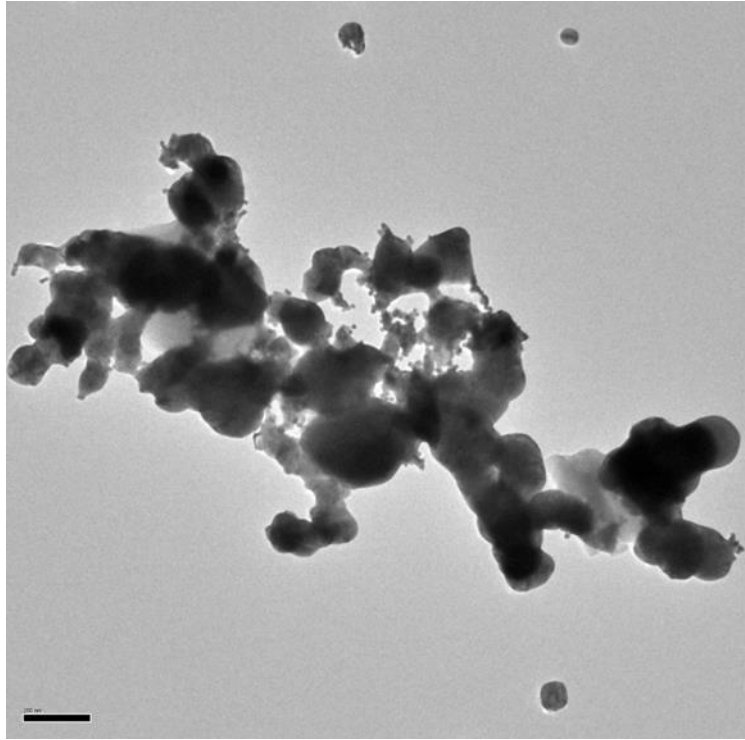

Figure S9. TEM images of 10 mM  $\text{Ag}^+$  deposition solutions containing Au NP suspensions (0.36 nM; diameter: 13 nm).

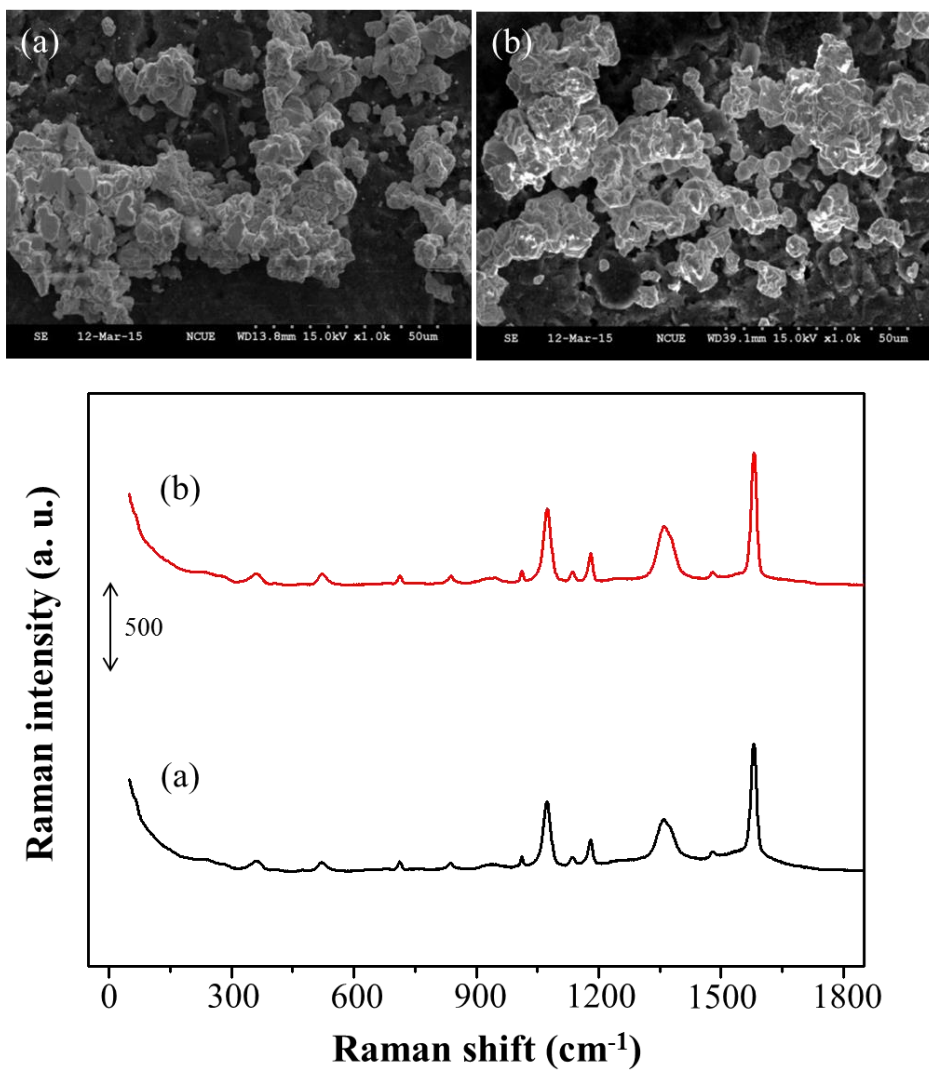

Figure S10. SEM images and SERS spectra of 4-MBA ( $10^{-5}$  M) molecules adsorbed onto Ag substrates in various deposition solutions: (a) 10 mM  $\text{Ag}^+$  ions and 32 nm Au NPs, and (b) 10 mM  $\text{Ag}^+$  ions and 56 nm Au NPs.

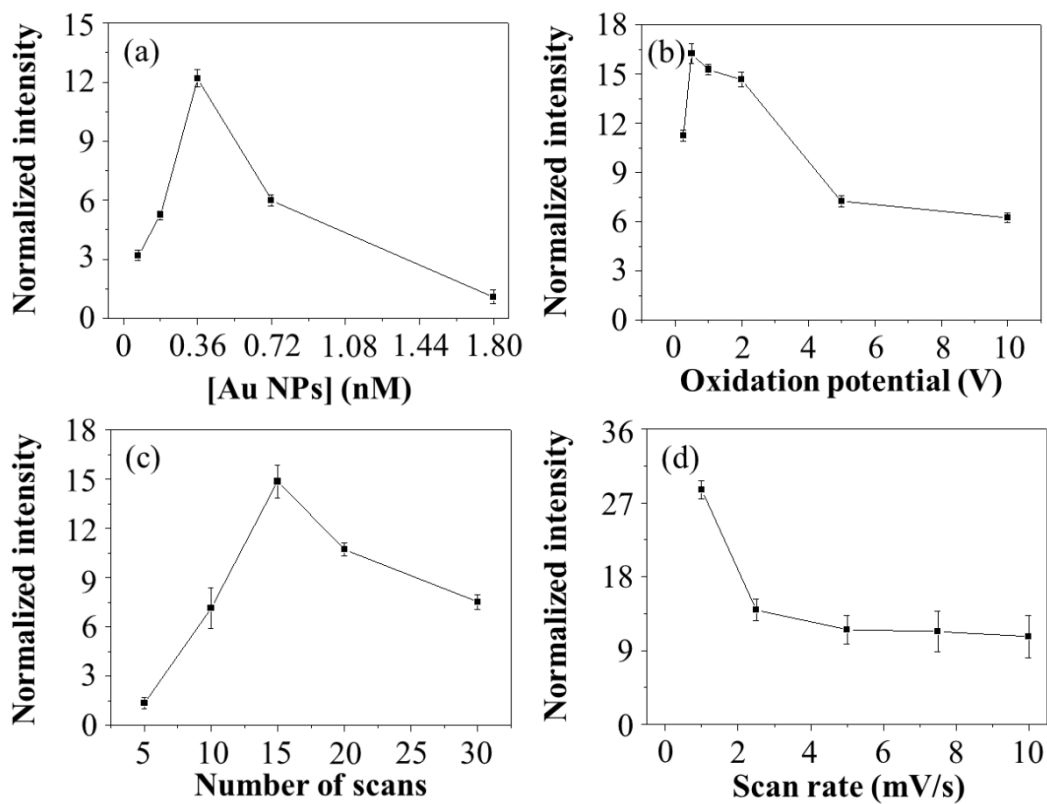

Figure S11. Normalized Raman intensity of  $10^{-5}$  M 4-MBA adsorbed onto the Ag structures at different (a) concentrations of 13 nm Au NPs, (b) oxidation potentials, (c) number of deposition scans, and (d) deposition scan rates.

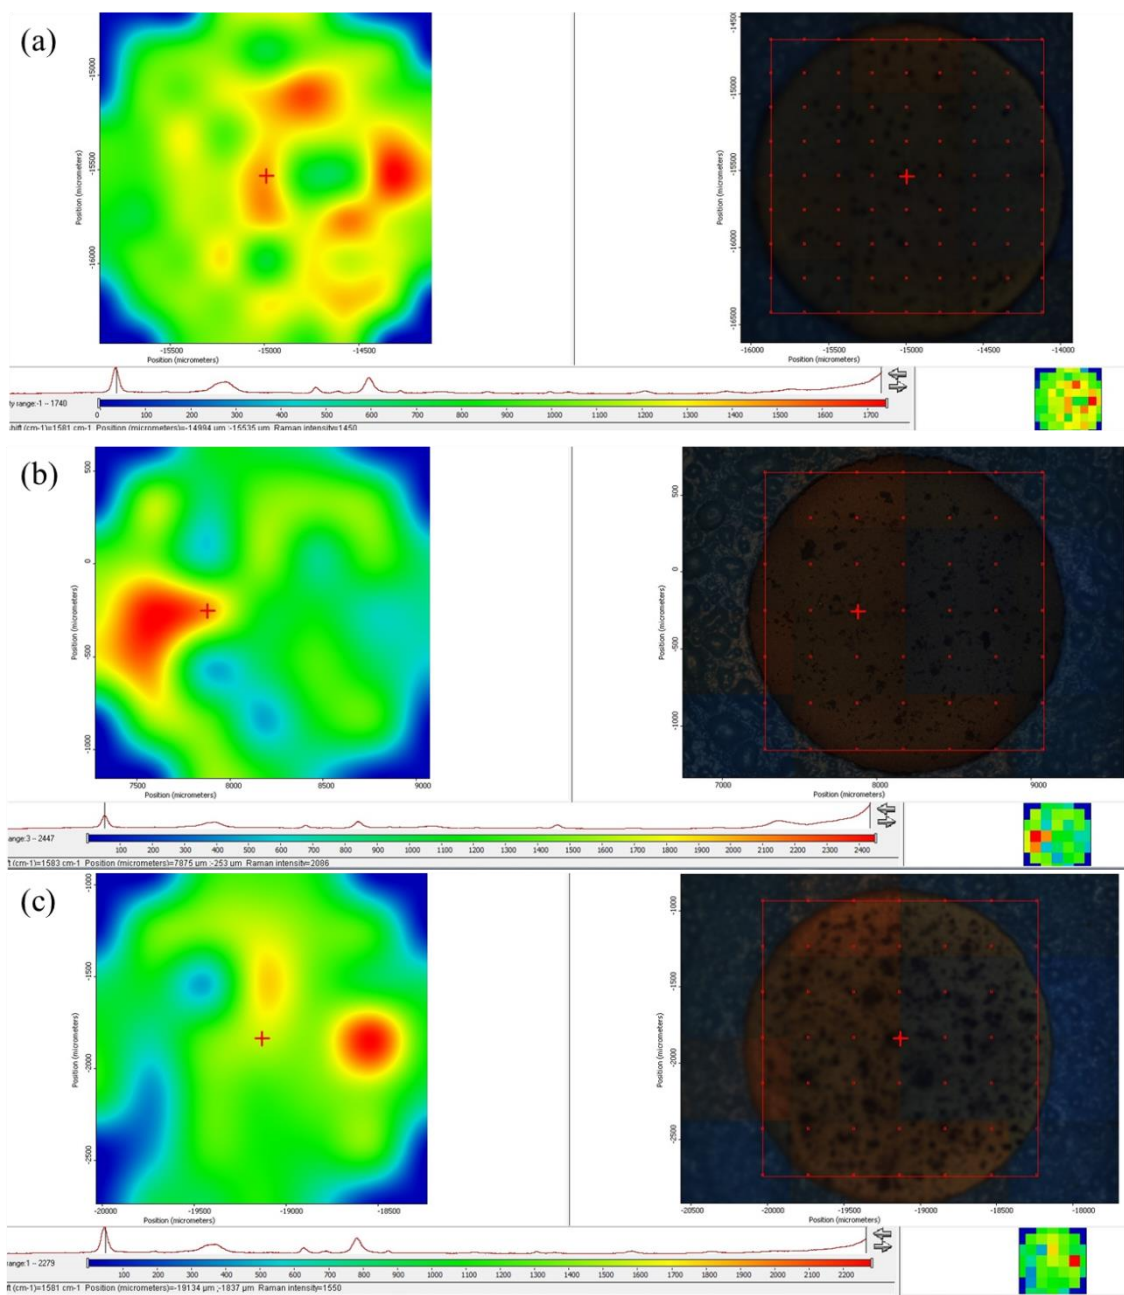

Figure S12. Raman mapping images of 4-MBA on three batches of desert-rose-like Ag substrates.



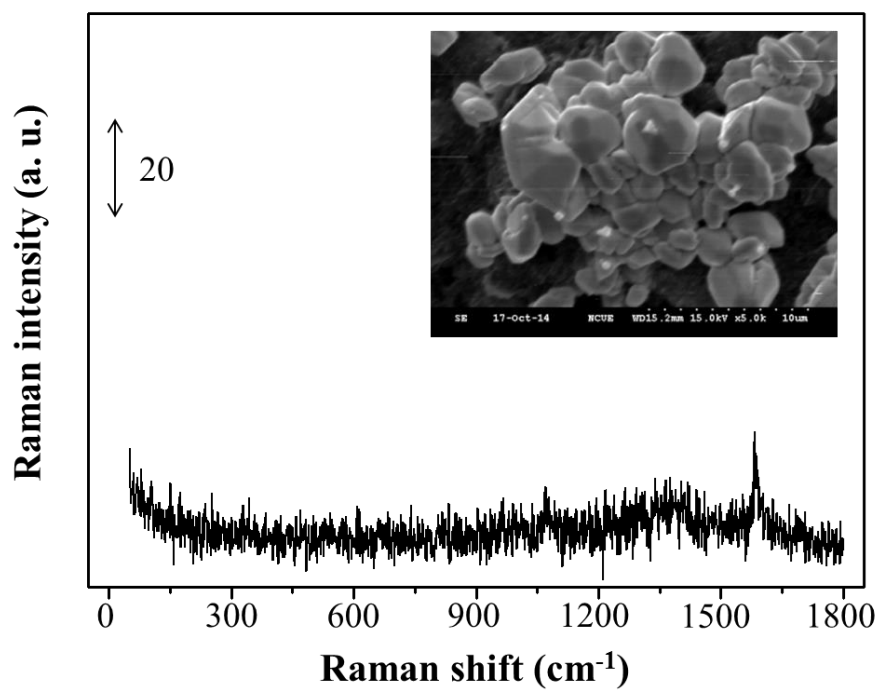

Figure S13. Raman spectra of 4-MBA adsorbed onto irregularly shaped Ag particles at 80 °C. Inset: SEM images of Ag particles on SPCE at 80 °C.

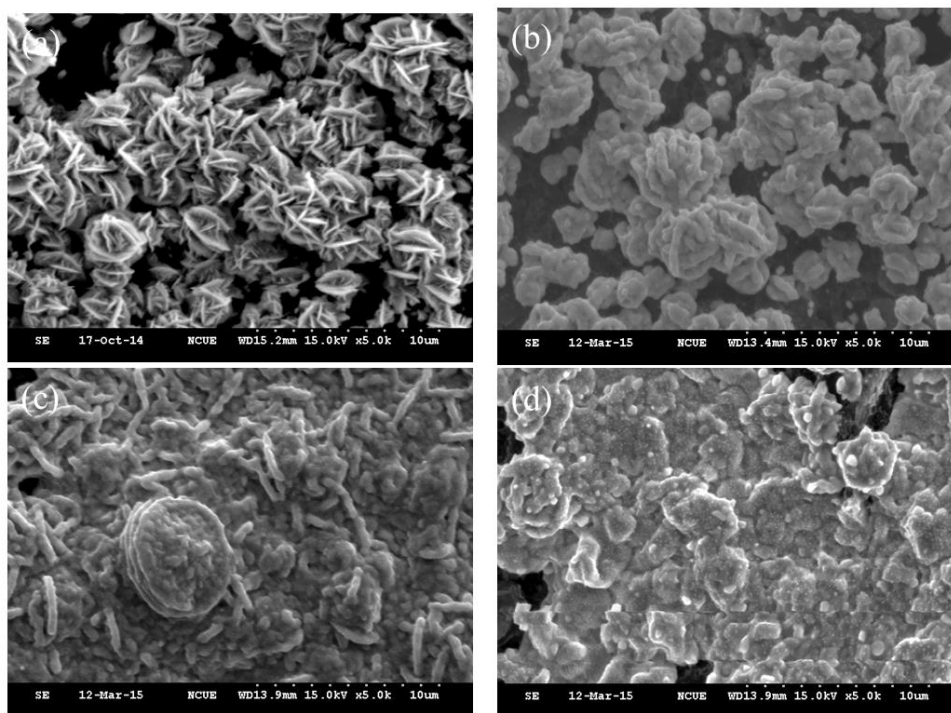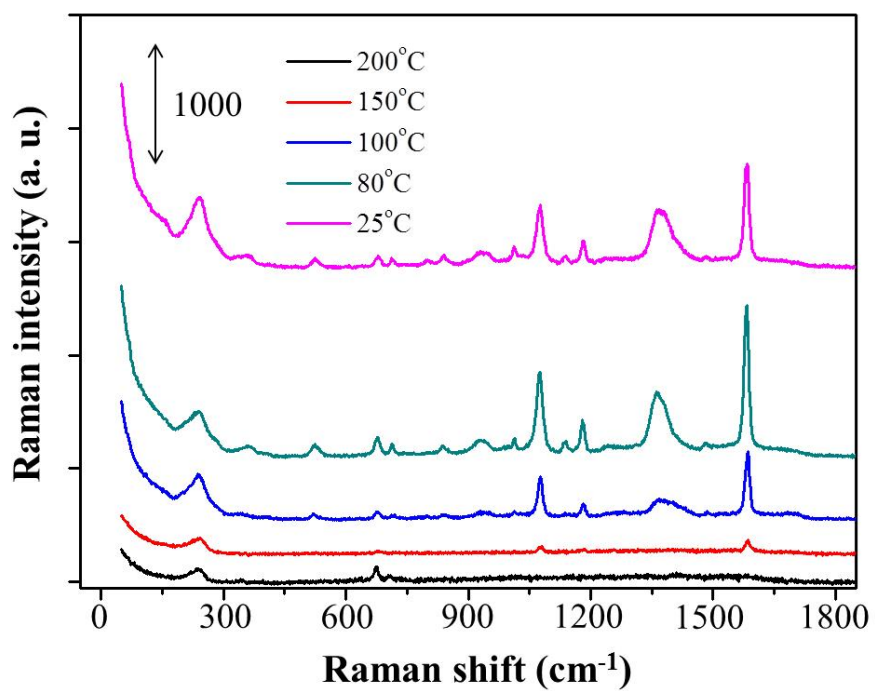

Figure S14. SEM images and Raman spectra of 4-MBA on Ag structures at various temperatures:(a)80 °C, (b) 100 °C, (c) 150 °C, and (d) 200 °C.

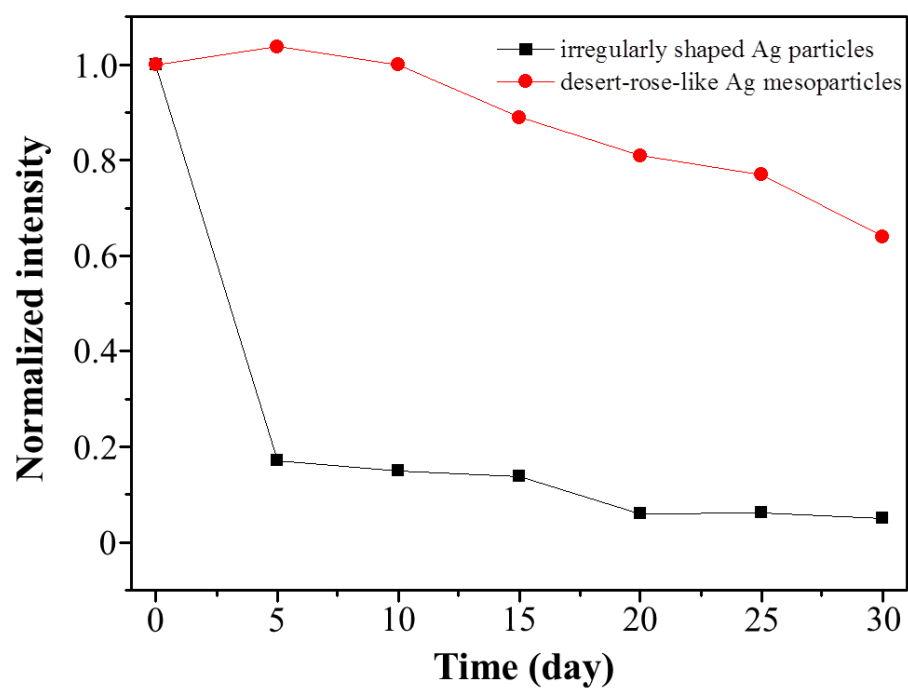

Figure S15. Variation in the normalized Raman intensity of 4-MBA adsorbed onto the irregularly shaped Ag particles (black) and desert-rose-like Ag mesoparticles (red) in 50% RH and 20% O<sub>2</sub> at 25 °C for 30 days.

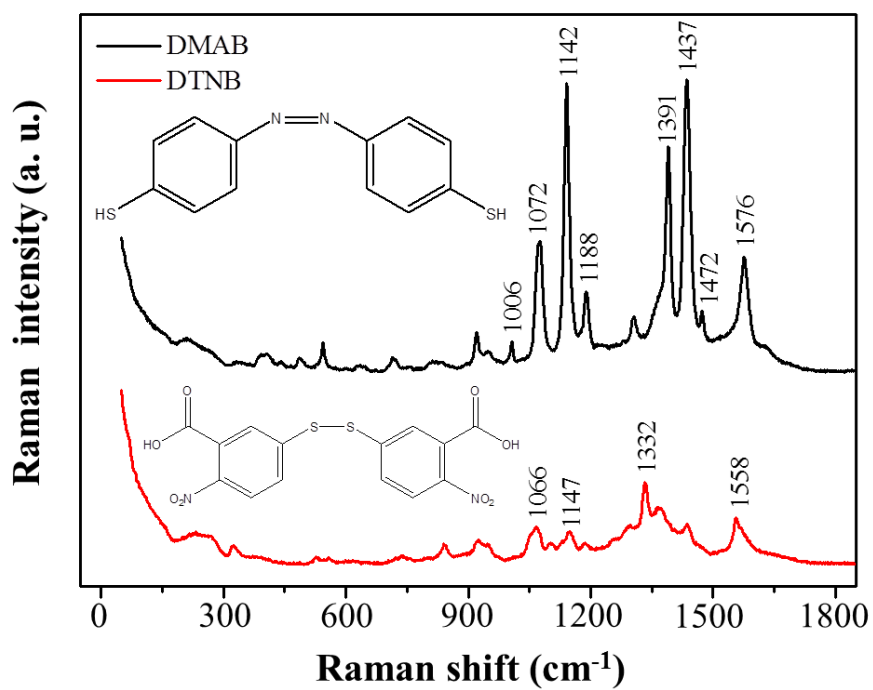

Figure S16. Raman spectrum of  $10^{-5}$  M DMAB and DTNB molecules adsorbed onto the desert-rose-like Ag mesoparticles.

## References

1. Y. F. Shen, J. B. Wang, U. Kuhlmann, P. Hildebrandt, K. Ariga, H. Mohwald, D. G. Kurth and T. Nakanishi, *Chem-Eur. J.*, 2009, **15**, 2763-2767.
2. J. H. Kim, T. Kang, S. M. Yoo, S. Y. Lee, B. Kim and Y. K. Choi, *Nanotechnology*, 2009, **20**.
3. A. Gutes, C. Carraro and R. Maboudian, *ACS App. Mater. Inter.*, 2009, **1**, 2551-2555.
4. Y. Su, Q. He, X. H. Yan, J. B. Fei, Y. E. Cui and J. B. Li, *Chem-Eur. J.*, 2011, **17**, 3370-3375.
5. Y. Y. Xia, T. J. Li, C. Gao, C. Ma and J. Chen, *J. Mater. Sci.*, 2014, **49**, 2781-2786.
